# Supplementary material for: A method for simultaneous bioflocculation and pretreatment of algal biomass targeting improved methane production
Source: Royal Society of Chemistry journal article supplement (doi:10.1039/c6gc01483f), 2016-01-01
Supplement: c6gc01483f1.pdf [file c6gc01483f1.pdf]

**Supplementary data:**

**Method for simultaneous bioflocculation and pretreatment of algal biomass targeting improved methane production**

Sanjeev Kumar Prajapati<sup>1</sup>, Arghya Bhattacharya<sup>2</sup>, Pushpendar Kumar<sup>2</sup>, Anushree Malik\*<sup>2</sup>,  
Virendra Kumar Vijay<sup>3</sup>

<sup>1</sup>Biochemical Engineering and Bioenergy Research Laboratory (BEBRL), Division of Biotechnology, Netaji Subhas Institute of Technology (University of Delhi), Sector 3, Dwarka, New Delhi (India) 110078

<sup>2</sup>Applied Microbiology Laboratory and <sup>3</sup>Biogas Laboratory, Centre for Rural Development and Technology, Indian Institute of Technology, Delhi, Hauz Khas, New Delhi (India) - 110016

**Email addresses:** [sanjeev.kumar@nsit.ac.in](mailto:sanjeev.kumar@nsit.ac.in), [sanjukec@gmail.com](mailto:sanjukec@gmail.com), (S. K. Prajapati)

[anushree@rdat.iitd.ac.in](mailto:anushree@rdat.iitd.ac.in), [anushree\\_malik@yahoo.com](mailto:anushree_malik@yahoo.com) (A. Malik)

\* Corresponding author,

Tel.: +91 11 26591158; fax: +91 11 26591121

**Table S1: pH data recorded during bioflocculation of *Chroococcus* sp at different F/A ratios, with and without nutrient supplementation.**

| <b>F/A ratio</b> | <b>Without Nutrients</b> |                 | <b>With Nutrients</b> |                 |
|------------------|--------------------------|-----------------|-----------------------|-----------------|
|                  | <b>Initial pH</b>        | <b>Final pH</b> | <b>Initial pH</b>     | <b>Final pH</b> |
| 1:1              | 7.28                     | 6.87            | 7.01                  | 6.02            |
| 1:3              | 8.12                     | 7.12            | 7.89                  | 7.12            |
| 1:6              | 8.84                     | 7.21            | 7.16                  | 6.25            |
| 1:9              | 8.89                     | 7.46            | 7.23                  | 6.22            |

**a**

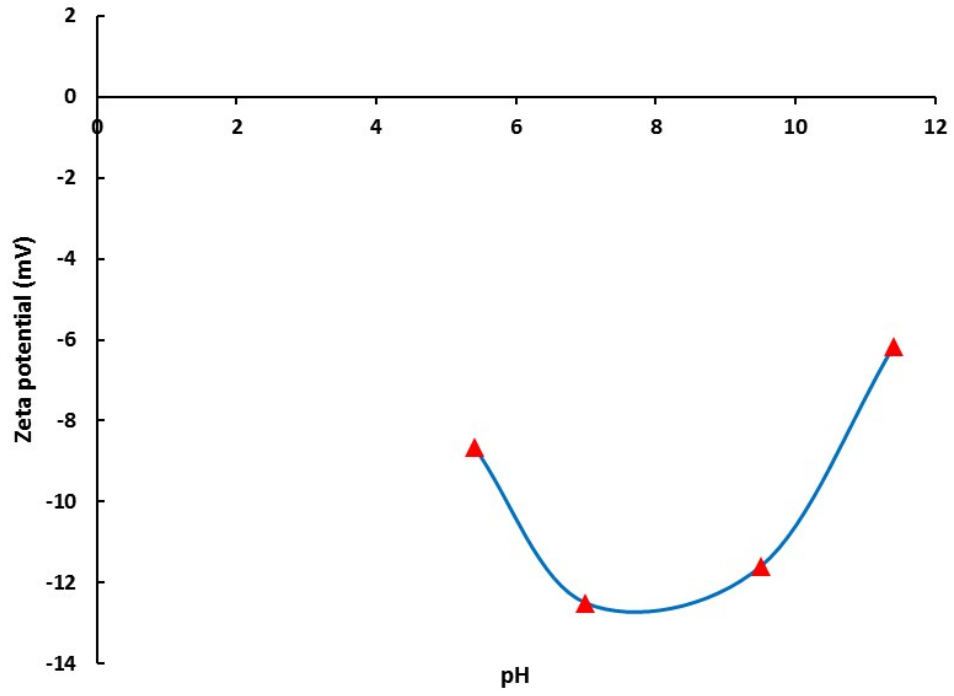

**b**

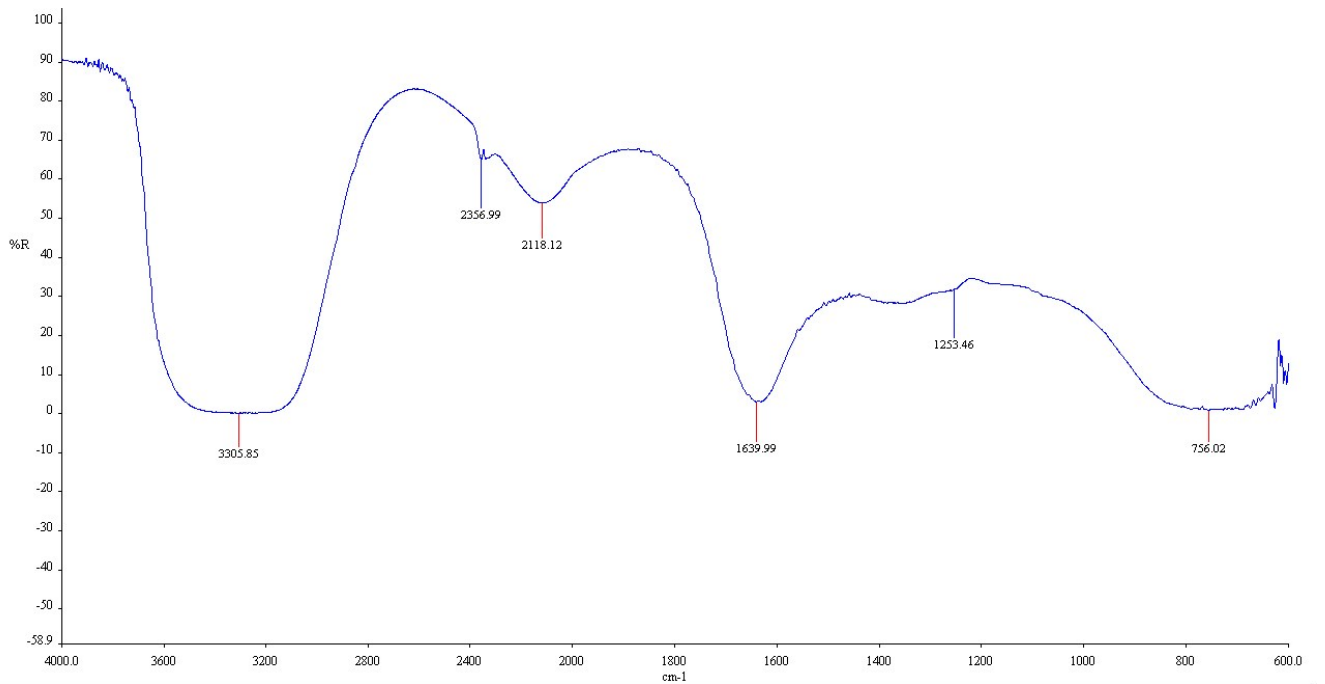

**Figure S1: (a) Zeta potential variation of *Chroococcus* sp. with pH; (b) FTIR spectrum of *Chroococcus* sp.**

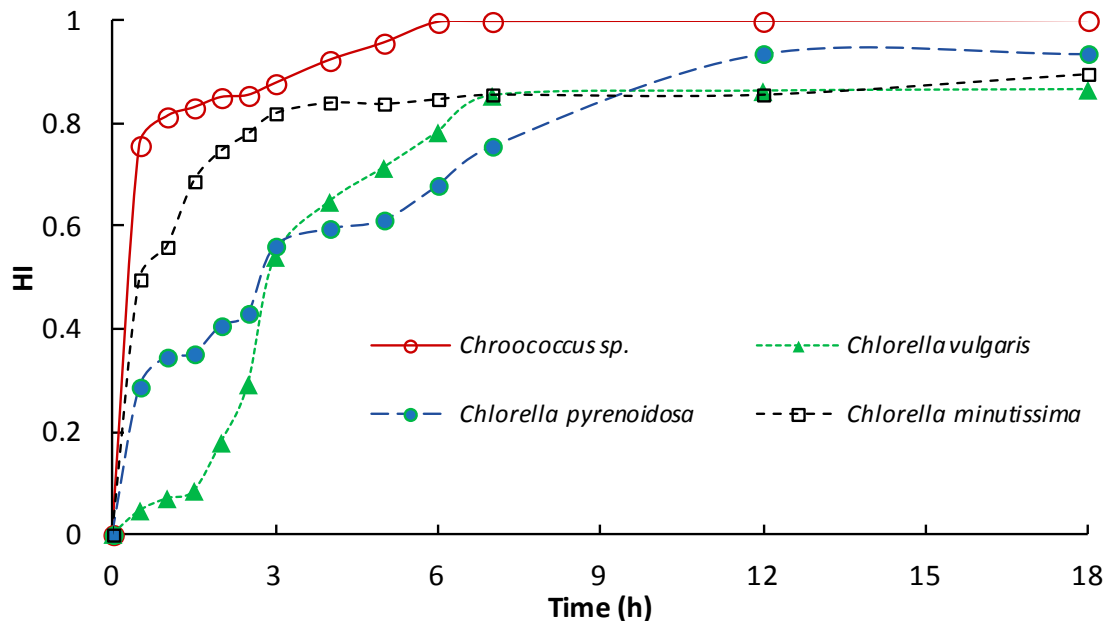

**Figure S2: Harvesting profiles of *Chlorella vulgaris*, *Chlorella pyrenoidosa*, *Chlorella minutissima* and *Chroococcus sp.* during bioflocculation using *A. lentulus***
